# Supplementary material for: Ghrelin protects against lipopolysaccharide-induced acute respiratory distress syndrome through the PI3K/AKT pathway
Source: PubMed Central journal article supplement — J Biol Chem. 2021 Aug 23;297(3):101111. doi: 10.1016/j.jbc.2021.101111 (PMC8445891; doi:10.1016/j.jbc.2021.101111), 2021-08-23
Supplement: mmc1.pdf [file mmc1.pdf]

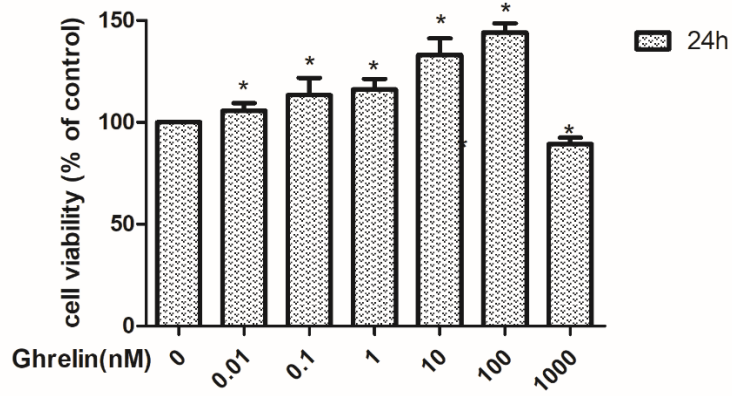

**Figure S1 Effect of ghrelin on proliferation of endothelial cells in vitro.**

CCK-8 assay was performed on EA.hy 926 cells showing an increase in cell growth increased as the concentration of ghrelin increased (0-100nM). Representative of three independent experiments, mean  $\pm$  standard error of the mean, \*P<0.05 vs control.
